# Supplementary material
Source: Springer Nature journal article supplement (https://www.springermedizin.de/resource/supplementary/12961_2014_334_MOESM9_ESM.pdf/9571074)
Supplement: MOESM9 [file 9571074]

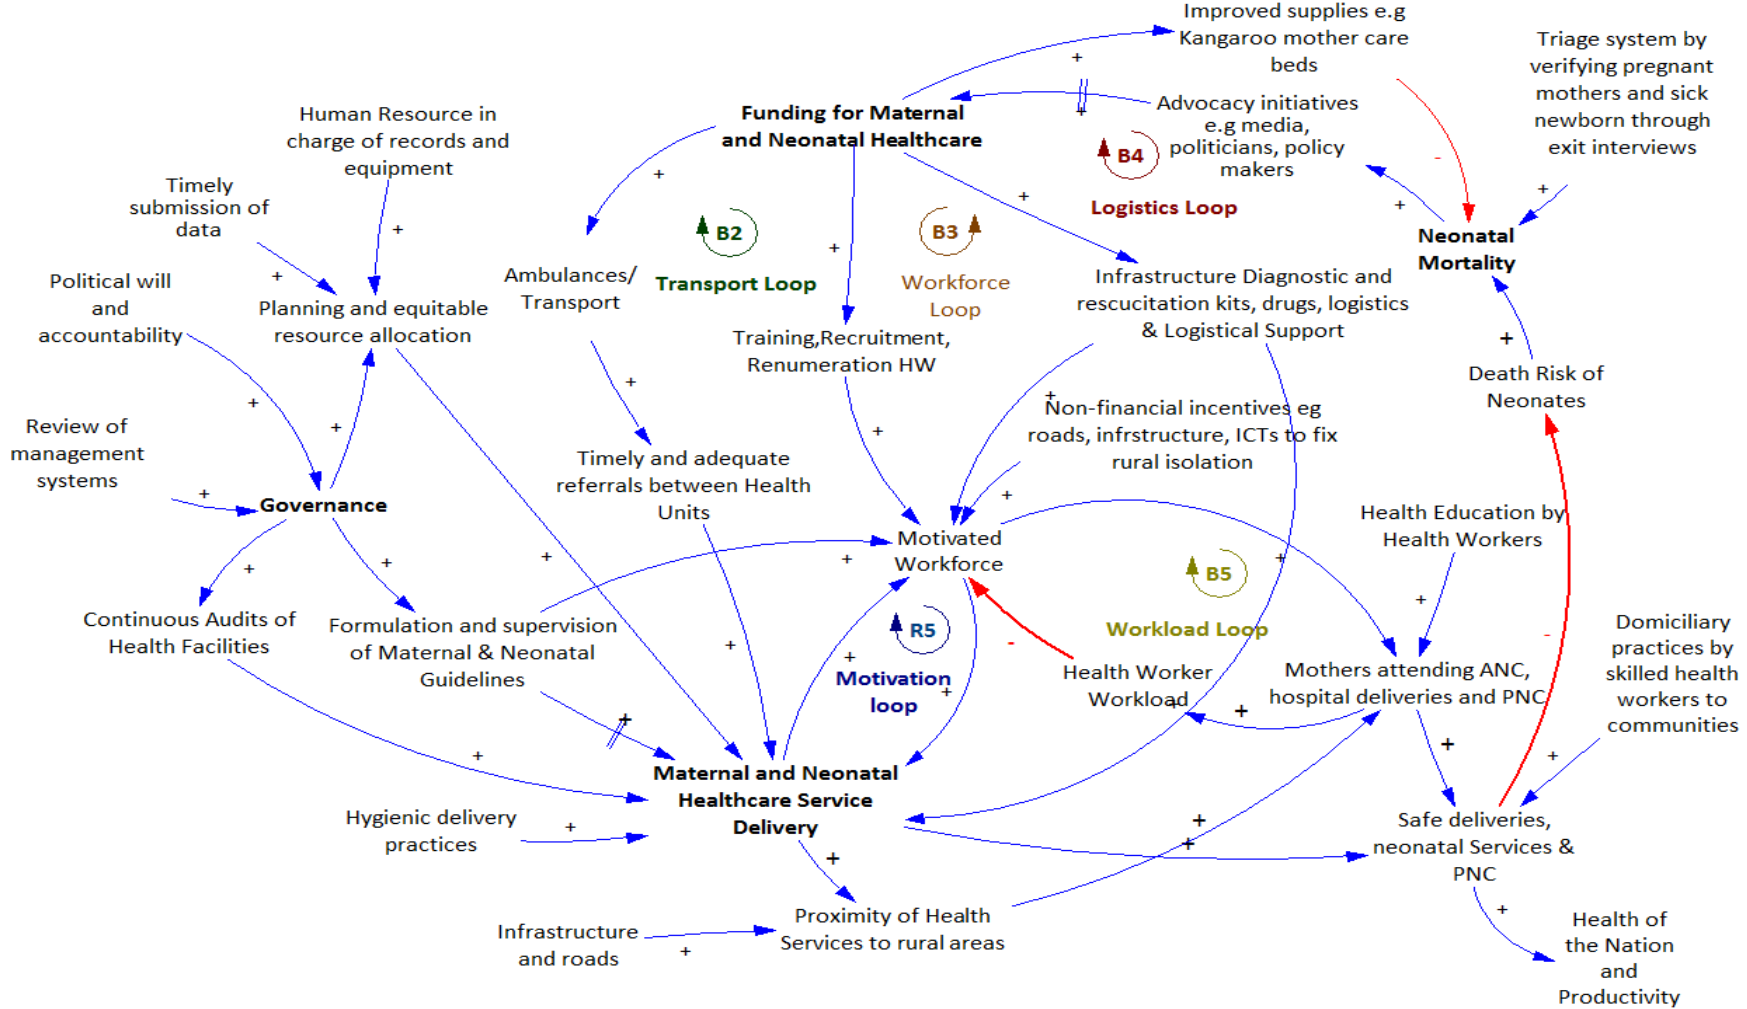

**Legend**

- 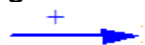 Denotes a **positive link** where a change in the influencing element is in the same direction as the influenced element
  -  Denotes a **negative link** where a change in the influencing element is in the opposite direction as the influenced element
  -  Denotes a **delay** where a change in the influencing element produces a change in the influenced element only after a delay
  -  Denotes a **balancing loop (B2)** in the clockwise direction
  -  Denotes a **reinforcing loop (R5)** in the clockwise direction
- Similarly B3, B4 and B5 are balancing loops
